# Supplementary material for: Telomeric repeat evolution in the phylum Nematoda revealed by high-quality genome assemblies and subtelomere structures
Source: HighWire-hosted journal article supplement (doi:10.1101/gr.278124.123), 2023-11-01
Supplement: Supplemental_Tables.xlsx [file Supplemental_Tables.xlsx]

## Sheet: Table S1
Supplemental Table S1. Accession numbers for genome assembly and short-read sequencing data, genome sizes, and TRMs for species for which we identified the putative TRM. Five million sub-sampled reads were used. Orange box, genome assembly accessions belonging to a different BioProject from short-read sequencing data for the species; green box, novel TRM. ND: not determined.
Clade	Species	Genome_assembly_accession	Genome_size (bp)	SRA_accession	Putative_TRM	Average_counts_of_23-mer_with_Putative_TRM_concatemers	Average_counts_of_23-mer_with_microsatellite_motif_(AAAAAT)_concatemers	Average_counts_of_23-mer_with_TTAGGC_concatemers	23-mer_5bp_concatemers	23-mer_5bp_concatemers_count	23-mer_6bp_concatemers	23-mer_6bp_concatemers_count	23-mer_7bp_concatemers	23-mer_7bp_concatemers_count
I	Romanomermis culicivorax	GCA_001039655.1	322765759	ERR218335	TTAGGC	65535	4.66667	65535	AAAGAAAAGAAAAGAAAAGAAAA	33187	AAGCCTAAGCCTAAGCCTAAGCC	65535	AACATATAACATATAACATATAA	1218
I	Soboliphyme baturini	GCA_900618415.1	218332512	ERR161908	TTAGGC	65535	0.5	65535	ACTACACTACACTACACTACACT	ND	CCTAAGCCTAAGCCTAAGCCTAA	65535	ACTGATGACTGATGACTGATGAC	191
I	Trichuris muris	GCA_000612645.2	111837642	ERR386523	TTAGGC	11515.5	3.83333	11515.5	AAAACAAAACAAAACAAAACAAA	ND	GCCTAAGCCTAAGCCTAAGCCTA	11600	AAAAGAGAAAAGAGAAAAGAGAA	ND
I	Trichuris suis	GCA_000797535.1	63839715	SRR1221119	TTAGGC	53125.3	0	53125.3	GAATAGAATAGAATAGAATAGAA	594	AGCCTAAGCCTAAGCCTAAGCCT	56226	AAAAAAGAAAAAAGAAAAAAGAA	ND
I	Trichuris trichiura	GCA_000613005.1	75496394	ERR065031	TTAGGC	20212.8	5.33333	20212.8	CACGCCACGCCACGCCACGCCAC	ND	CCTAAGCCTAAGCCTAAGCCTAA	20432	AAAAAAGAAAAAAGAAAAAAGAA	194
III	Acanthocheilonema viteae	GCA_900537255.1	77350906	ERR247391	TTAGGC	65535	0.5	65535	AACAGAACAGAACAGAACAGAAC	1177	AAGCCTAAGCCTAAGCCTAAGCC	65535	CAAATAACAAATAACAAATAACA	187
III	Anisakis simplex	GCA_900617985.1	126869778	ERR173790	TTAGGC	14464.2	0	14464.2	AGAATAGAATAGAATAGAATAGA	ND	AGCCTAAGCCTAAGCCTAAGCCT	14579	AAGGATAAAGGATAAAGGATAAA	ND
III	Ascaris suum	GCA_013433145.1	278641931	SRR5573040	TTAGGC	43722	14.6667	43722	GAATTGAATTGAATTGAATTGAA	4105	AGCCTAAGCCTAAGCCTAAGCCT	46367	ATATCATATATCATATATCATAT	ND
III	Brugia malayi	GCA_000002995.5	87155713	SRR3111318	TTAGGC	65535	1.66667	65535	AGGTGAGGTGAGGTGAGGTGAGG	553	AGCCTAAGCCTAAGCCTAAGCCT	65535	GAAGAAGGAAGAAGGAAGAAGGA	107
III	Brugia pahangi	GCA_012070555.1	96392917	SRR13482039	TTAGGC	33977.3	20.5	33977.3	GAAATGAAATGAAATGAAATGAA	504	GCTTAGGCTTAGGCTTAGGCTTA	34753	AAAAACAAAAAACAAAAAACAAA	ND
III	Brugia timori	GCA_900618025.1	64930714	ERR346916	TTAGGC	65535	14.5	65535	GAAATGAAATGAAATGAAATGAA	853	AGCCTAAGCCTAAGCCTAAGCCT	65535	AAAAACAAAAAACAAAAAACAAA	1609
III	Dracunculus medinensis	GCA_900625125.1	103750625	ERR1243208	TTAGGC	6578.33	8.16667	6578.33	ATAATATAATATAATATAATATA	4483	GCCTAAGCCTAAGCCTAAGCCTA	6612	AATTAATAATTAATAATTAATAA	ND
III	Enterobius vermicularis	GCA_900576705.1	150050672	ERR310935	TTAGGC	11845.3	183	11845.3	GAATGGAATGGAATGGAATGGAA	7910	GCTTAGGCTTAGGCTTAGGCTTA	12646	ATATAATATATAATATATAATAT	370
III	Loa loa	GCA_000733445.1	96405388	SRR1268998	TTAGGC	47493	24	47493	GAACAGAACAGAACAGAACAGAA	718	CTAAGCCTAAGCCTAAGCCTAAG	48401	AATAATAAATAATAAATAATAAA	126
III	Onchocerca flexuosa	GCA_002249935.1	67740367	ERR126083	TTAGGC	65535	269.167	65535	AAAACAAAACAAAACAAAACAAA	20968	GCTTAGGCTTAGGCTTAGGCTTA	65535	AATAATAAATAATAAATAATAAA	2418
III	Onchocerca ochengi	GCA_900537205.1	95513350	ERR2203777	TTAGGC	2129.17	0	2129.17	ACTGAACTGAACTGAACTGAACT	372	AACCCTAACCCTAACCCTAACCC	7271	CAATATGCAATATGCAATATGCA	253
III	Onchocerca volvulus	GCA_000499405.2	96340582	SRR2924837	TTAGGC	247.833	16	247.833	GAATGGAATGGAATGGAATGGAA	1418	CCTAAGCCTAAGCCTAAGCCTAA	254	AATAATAAATAATAAATAATAAA	ND
III	Parascaris univalens	GCA_002259215.1	242743000	SRR5574328	TTAGGC	30115.2	7.83333	30115.2	AATTCAATTCAATTCAATTCAAT	65535	AAGCCTAAGCCTAAGCCTAAGCC	31937	AGAGGAGAGAGGAGAGAGGAGAG	2069
III	Thelazia callipaeda	GCA_900618365.1	75392092	ERR170737	TTAGGC	29151.2	16.8333	29151.2	CTATACTATACTATACTATACTA	119	AGCCTAAGCCTAAGCCTAAGCCT	29540	TATAATATATAATATATAATATA	ND
III	Toxocara canis	GCA_000803305.1	317115901	SRR1706745	TTAGGC	444.833	2.66667	444.833	ATCGAATCGAATCGAATCGAATC	1632	CCTAAGCCTAAGCCTAAGCCTAA	452	AAGAAGAAAGAAGAAAGAAGAAA	ND
IV	Bursaphelenchus okinawaensis	GCA_904067145.1	69956301	DRR243732	TTAGGC	65535	0	65535	GTAGGGTAGGGTAGGGTAGGGTA	35657	GCTTAGGCTTAGGCTTAGGCTTA	65535	AAAGGCTAAAGGCTAAAGGCTAA	ND
IV	Bursaphelenchus xylophilus	GCA_904067135.1	78274012	DRR243726	TTAGGC	4393.17	1.33333	4393.17	GCCCGGCCCGGCCCGGCCCGGCC	318	AAGCCTAAGCCTAAGCCTAAGCC	4520	CCTACCACCTACCACCTACCACC	ND
IV	Deladenus siricidicola	GCA_009724625.1	100561339	SRR8439222	TTAGGC	24133.2	19.1667	24133.2	GAAAGGAAAGGAAAGGAAAGGAA	5524	AAGCCTAAGCCTAAGCCTAAGCC	24304	AAATCGAAAATCGAAAATCGAAA	130
IV	Globodera ellingtonae	GCA_001723225.1	105964814	SRR3162515	TTAGGC	2863.5	2.33333	2863.5	ATACCATACCATACCATACCATA	355	GCCTAAGCCTAAGCCTAAGCCTA	2910	AAATCGAAAATCGAAAATCGAAA	ND
IV	Globodera pallida	GCA_000724045.1	123625196	ERR4804772	TTAGGC	65535	5.16667	65535	AATTCAATTCAATTCAATTCAAT	46358	GCCTAAGCCTAAGCCTAAGCCTA	65535	TAAACCCTAAACCCTAAACCCTA	285
IV	Globodera rostochiensis	GCA_900079975.1	95876286	SRR13560391	TTAGGC	65477.8	9.33333	65477.8	AATTGAATTGAATTGAATTGAAT	ND	GCCTAAGCCTAAGCCTAAGCCTA	65535	CCGCCTCCCGCCTCCCGCCTCCC	ND
IV	Meloidogyne floridensis	GCA_003693605.1	74846012	ERR104974	TTAGGC	380	3.25	380	AGGTTAGGTTAGGTTAGGTTAGG	1017	CTAAGCCTAAGCCTAAGCCTAAG	383	AAATCGAAAATCGAAAATCGAAA	ND
IV	Meloidogyne graminicola	GCA_014773135.1	41549413	SRR2350719	TTAGGC	2303.83	36	2303.83	AATTAAATTAAATTAAATTAAAT	15496	AAGCCTAAGCCTAAGCCTAAGCC	2325	CCCAATCCCCAATCCCCAATCCC	157
IV	Panagrellus redivivus	GCA_000341325.1	65093147	SRR25684730	TTAGAC	10715	0	0	AAATGAAATGAAATGAAATGAAA	ND	AAGTCTAAGTCTAAGTCTAAGTC	11379	AGAAGGCAGAAGGCAGAAGGCAG	ND
IV	Panagrolaimus davidi	GCA_901779475.1	118052509	SRR1544448	TTAGGC	5534.67	3.66667	5534.67	CAAAACAAAACAAAACAAAACAA	ND	AAGCCTAAGCCTAAGCCTAAGCC	5731	ACTTTCAACTTTCAACTTTCAAC	ND
IV	Panagrolaimus sp. ES5	GCA_901766855.1	90240976	SRR5257058	TTAGGC	5732	0	5732	ACCATACCATACCATACCATACC	ND	GCCTAAGCCTAAGCCTAAGCCTA	5827	GCAATTAGCAATTAGCAATTAGC	ND
IV	Panagrolaimus sp. PS1159	GCA_901765195.1	84957092	SRR5256914	TTAGGC	65535	0	65535	AACCTAACCTAACCTAACCTAAC	111	GCCTAAGCCTAAGCCTAAGCCTA	65535	CGAGGCGCGAGGCGCGAGGCGCG	ND
IV	Panagrolaimus sp. PS1579	GCA_901779485.1	48802921	SRR5257057	TTAGGC	36218.2	0	36218.2	AAGTGAAGTGAAGTGAAGTGAAG	ND	AGCCTAAGCCTAAGCCTAAGCCT	36829	AGTCCGAAGTCCGAAGTCCGAAG	ND
IV	Strongyloides ratti	GCA_001040885.1	43150242	ERR3900850	TTAGGG	184.5	0.666667	0	AATGGAATGGAATGGAATGGAAT	363	CTAACCCTAACCCTAACCCTAAC	189	CCCTAAACCCTAAACCCTAAACC	ND
V	Ancylostoma ceylanicum	GCA_000688135.1	313092710	SRR1124848	TTAGGC	7712.33	10.5	7712.33	ACTACACTACACTACACTACACT	831	GCTTAGGCTTAGGCTTAGGCTTA	9945	ATAATAAATAATAAATAATAAAT	ND
V	Angiostrongylus cantonensis	GCA_001884285.1	260768283	SRR1588192	TTAGGC	31801.3	2.16667	31801.3	AAGAGAAGAGAAGAGAAGAGAAG	256	GCCTAAGCCTAAGCCTAAGCCTA	32037	AGGATAAAGGATAAAGGATAAAG	ND
V	Angiostrongylus costaricensis	GCA_900624975.1	262782696	ERR126086	TTAGGC	9174.33	0	9174.33	ACAACACAACACAACACAACACA	ND	GCCTAAGCCTAAGCCTAAGCCTA	9241	AAAGAGGAAAGAGGAAAGAGGAA	ND
V	Caenorhabditis becei	GCA_900536315.3	87867412	ERR2740766	TTAGGC	29219.2	0	29219.2	CCGGCCCGGCCCGGCCCGGCCCG	ND	AGCCTAAGCCTAAGCCTAAGCCT	32137	AAGCCTGAAGCCTGAAGCCTGAA	447
V	Caenorhabditis bovis	GCA_902829315.1	62726283	ERR3610811	TTAGGC	2220.17	0	2220.17	CGATCCGATCCGATCCGATCCGA	ND	AGCCTAAGCCTAAGCCTAAGCCT	2390	ATATAATATATAATATATAATAT	ND
V	Caenorhabditis brenneri	GCA_000143925.2	190369721	ERR5086752	TTAGGC	16286.8	1.16667	16286.8	CCCGGCCCGGCCCGGCCCGGCCC	405	GCCTAAGCCTAAGCCTAAGCCTA	16324	GCCTCAAGCCTCAAGCCTCAAGC	119
V	Caenorhabditis briggsae	GCA_000004555.3	108384165	SRR8333803	TTAGGC	12841.2	0	12841.2	CCGGCCCGGCCCGGCCCGGCCCG	106	AGCCTAAGCCTAAGCCTAAGCCT	14076	AGGACCCAGGACCCAGGACCCAG	1424
V	Caenorhabditis elegans	WormBase release WS286 (PRJEB28388)	102092263	SRR14489487	TTAGGC	2214.83	13	2214.83	GCATCGCATCGCATCGCATCGCA	ND	GCTTAGGCTTAGGCTTAGGCTTA	2237	ACTACAAACTACAAACTACAAAC	258
V	Caenorhabditis inopinata	GCA_003052745.1	122994328	DRR093018	TTAGGC	6836.5	2.16667	6836.5	AATCGAATCGAATCGAATCGAAT	310	GCTTAGGCTTAGGCTTAGGCTTA	7703	CAAACTACAAACTACAAACTACA	587
V	Caenorhabditis latens	GCA_002259235.1	117124750	SRR5831579	TTAGGC	15811.7	0	15811.7	AGACCAGACCAGACCAGACCAGA	222	AGCCTAAGCCTAAGCCTAAGCCT	16081	GACCCTAGACCCTAGACCCTAGA	823
V	Caenorhabditis nigoni	GCA_002742825.1	129488540	SRR6192910	TTAGGC	1394.33	0	1394.33	AAATGAAATGAAATGAAATGAAA	4515	GCCTAAGCCTAAGCCTAAGCCTA	1428	CCCAGGACCCAGGACCCAGGACC	3899
V	Caenorhabditis panamensis	GCA_900883565.2	79045575	ERR2740844	TTAGGC	60926.5	36.8333	60926.5	AAGCTAAGCTAAGCTAAGCTAAG	349	CTAAGCCTAAGCCTAAGCCTAAG	61183	GAAGAAAGAAGAAAGAAGAAAGA	217
V	Caenorhabditis remanei	GCA_010183535.1	130480874	SRR10276662	TTAGGC	6166.67	0	6166.67	CCGGCCCGGCCCGGCCCGGCCCG	242	AGCCTAAGCCTAAGCCTAAGCCT	6597	TAGACCCTAGACCCTAGACCCTA	1300
V	Caenorhabditis sp. 21LS-2015	GCA_900536235.3	93733926	ERR1233390	TTAGGC	7044.33	0	7044.33	GCATCGCATCGCATCGCATCGCA	ND	AAGCCTAAGCCTAAGCCTAAGCC	7195	CGACTTCCGACTTCCGACTTCCG	242
V	Caenorhabditis sp. 26LS-2015	GCA_900536285.3	101086038	ERR1233497	TTAGGC	3480.83	0.5	3480.83	CAAGCCAAGCCAAGCCAAGCCAA	335	AGCCTAAGCCTAAGCCTAAGCCT	3543	CCTTGAGCCTTGAGCCTTGAGCC	651
V	Caenorhabditis uteleia	GCA_900536295.3	104046868	ERR1233602	TTAGGT	6846	0	18.6667	AATCAAATCAAATCAAATCAAAT	380	AACCTAAACCTAAACCTAAACCT	6922	ATAGTTGATAGTTGATAGTTGAT	ND
V	Caenorhabditis sp. 32LS-2015	GCA_900536325.3	65098870	ERR1233608	TTAGGC	21002.7	3.33333	21002.7	CCGGCCCGGCCCGGCCCGGCCCG	142	CCTAAGCCTAAGCCTAAGCCTAA	21098	AACAACTAACAACTAACAACTAA	124
V	Caenorhabditis tropicalis	GCA_016735795.1	81574753	SRR12341276	TTAGGC	65535	1.16667	65535	ACCTAACCTAACCTAACCTAACC	1217	GCCTAAGCCTAAGCCTAAGCCTA	65535	TAGACCCTAGACCCTAGACCCTA	1189
V	Cylicostephanus goldi	GCA_900617965.1	173362437	ERR161912	TTAGGC	11572.8	1	11572.8	CACACCACACCACACCACACCAC	172	AGCCTAAGCCTAAGCCTAAGCCT	12484	ATACATCATACATCATACATCAT	154
V	Haemonchus contortus	GCA_007637855.2	465720674	SRR11022846	TTAGGC	6691.5	0	6691.5	TAATATAATATAATATAATATAA	1118	GCCTAAGCCTAAGCCTAAGCCTA	6727	CCAATCCCCAATCCCCAATCCCC	ND
V	Haemonchus placei	GCA_900617895.1	259125910	ERR066169	TTAGGC	7624.17	20.8333	7624.17	ATCGTATCGTATCGTATCGTATC	1394	AATGTAAATGTAAATGTAAATGT	12230	ATACATCATACATCATACATCAT	1951
V	Heligmosomoides polygyrus	GCA_900618505.1	560662278	ERR225619	TTAGGC	12966	11.8333	12966	ATATAATATAATATAATATAATA	177	GCCTAAGCCTAAGCCTAAGCCTA	13033	CGGATAACGGATAACGGATAACG	207
V	Heterorhabditis bacteriophora	GCA_000223415.1	76974349	SRR11108936	TTAGGC	12161.8	0.5	12161.8	ATCATATCATATCATATCATATC	ND	CTAAGCCTAAGCCTAAGCCTAAG	12233	ACGGAGCACGGAGCACGGAGCAC	ND
V	Nippostrongylus brasiliensis	GCA_900200055.1	347480154	ERR039257	TTAGGC	323.333	7.83333	323.333	AAATAAAATAAAATAAAATAAAA	103	CTAAGCCTAAGCCTAAGCCTAAG	340	TAACGGATAACGGATAACGGATA	ND
V	Oscheius tipulae	GCA_900184235.1	59468623	ERR1656469	TTAGGC	15272.2	0	15272.2	AATTTAATTTAATTTAATTTAAT	ND	CCTAAGCCTAAGCCTAAGCCTAA	15465	AGAGAAGAGAGAAGAGAGAAGAG	ND
V	Pristionchus entomophagus	GCA_900490825.1	264161588	ERR2114829	TTAGGC	2430	0.5	2430	CTCCTCTCCTCTCCTCTCCTCTC	183	CCTAAGCCTAAGCCTAAGCCTAA	2507	GAATGGAGAATGGAGAATGGAGA	158
V	Pristionchus exspectatus	GCA_900380275.1	177635997	SRR646204	TTAGGC	4013.5	0.5	4013.5	AATTCAATTCAATTCAATTCAAT	ND	CCTAAGCCTAAGCCTAAGCCTAA	4063	AAAGATCAAAGATCAAAGATCAA	495
V	Pristionchus fissidentatus	GCA_900490895.1	247442930	ERR2114823	TTAGGC	6008.67	0	6008.67	ATACAATACAATACAATACAATA	ND	AAGCCTAAGCCTAAGCCTAAGCC	6079	AAGTATTAAGTATTAAGTATTAA	182
V	Pristionchus japonicus	GCA_900490845.1	223093336	ERR2114846	TTAGGC	24559.2	0	24559.2	AGAGAAGAGAAGAGAAGAGAAGA	ND	CCTAAGCCTAAGCCTAAGCCTAA	24854	CATTCTTCATTCTTCATTCTTCA	860
V	Pristionchus maxplancki	GCA_900490775.1	265592641	ERR2114852	TTAGGC	2187	0	2187	ATACAATACAATACAATACAATA	ND	CCTAAGCCTAAGCCTAAGCCTAA	2230	CAAAGATCAAAGATCAAAGATCA	299
V	Pristionchus mayeri	GCA_900490875.1	297448349	ERR2114841	TTAGGC	1402.17	15.6667	1402.17	AATTGAATTGAATTGAATTGAAT	ND	GCCTAAGCCTAAGCCTAAGCCTA	1426	GAATGGAGAATGGAGAATGGAGA	1239
V	Pristionchus pacificus	GCA_000180635.4	158478356	ERR2531995	TTAGGC	10663.3	0.5	10663.3	AATTGAATTGAATTGAATTGAAT	172	CCTAAGCCTAAGCCTAAGCCTAA	10805	GAATAAAGAATAAAGAATAAAGA	613
V	Strongylus vulgaris	GCA_900624965.1	291096078	ERR173792	TTAGGC	1303.67	0	1303.67	ATGGTATGGTATGGTATGGTATG	ND	ACACATACACATACACATACACA	6437	CACAACACACAACACACAACACA	ND

## Sheet: Table S2
Supplemental Table S2. Accessions numbers of genome assembly and short-read sequencing data, genome sizes, and TRM analysis results for species for which we could not determine the TRM. Five million sub-sampled reads were used. Orange box, genome assembly accessions belonging to a different BioProject from short-read sequencing data for the species. ND: not determined.
Clade	Species	Genome_assembly_accession	Genome_size (bp)	SRA_accession	Putative_TRM	Average_counts_of_23-mer_with_Putative_TRM_concatemers	Average_counts_of_23-mer_with_microsatellite_motif_(AAAAAT)_concatemers	Average_counts_of_23-mer_with_TTAGGC_concatemers	23-mer_5bp_concatemers	23-mer_5bp_concatemers_count	23-mer_6bp_concatemers	23-mer_6bp_concatemers_count	23-mer_7bp_concatemers	23-mer_7bp_concatemers_count	Classification
I	Trichinella britovi	GCA_001447585.1	51504795	SRR1963585	TTAGGG	524.5	8.83333	0	ATATAATATAATATAATATAATA	482	AACCCTAACCCTAACCCTAACCC	549	AAAAACAAAAAACAAAAAACAAA	ND	Potential_sample_contamination
I	Trichinella murrelli	GCA_001447425.1	49016728	SRR1970497	ND	ND	8.33333	0	ATATAATATAATATAATATAATA	733	ATATACATATACATATACATATA	145	TACTGAATACTGAATACTGAATA	ND	Low_copy_number_motifs
I	Trichinella nativa	GCA_001447565.1	47933238	SRR1958752	TTAGGG	2966.67	2.5	3.16667	AAAACAAAACAAAACAAAACAAA	648	AACCCTAACCCTAACCCTAACCC	3059	AAAACAAAAAACAAAAAACAAAA	ND	Potential_sample_contamination
I	Trichinella nelsoni	GCA_001447455.1	47436005	SRR1971679	ND	ND	0.5	0	AATACAATACAATACAATACAAT	954	ATATACATATACATATACATATA	376	AATCGACAATCGACAATCGACAA	ND	Low_copy_number_motifs
I	Trichinella papuae	GCA_001447755.1	46844510	SRR1971673	ND	ND	9.83333	0	ATATAATATAATATAATATAATA	642	ATATACATATACATATACATATA	149	ATAATTAATAATTAATAATTAAT	ND	Low_copy_number_motifs
I	Trichinella patagoniensis	GCA_001447655.1	49773209	SRR1971735	ND	ND	9.5	0	ATAATATAATATAATATAATATA	234	ATATACATATACATATACATATA	ND	TATATAATATATAATATATAATA	ND	Low_copy_number_motifs
I	Trichinella pseudospiralis	GCA_001447645.1	49152658	SRR1970494	ND	ND	21	5.83333	ATATTATATTATATTATATTATA	1523	ATATACATATACATATACATATA	217	AATAATGAATAATGAATAATGAA	ND	Low_copy_number_motifs
I	Trichinella sp. T6	GCA_001447435.1	50853738	SRR1970503	ND	ND	3.66667	0	ATATAATATAATATAATATAATA	535	ATATACATATACATATACATATA	108	AGATGTAAGATGTAAGATGTAAG	ND	Low_copy_number_motifs
I	Trichinella sp. T8	GCA_001447745.1	49331761	SRR1971685	ND	ND	5.33333	0	ATATAATATAATATAATATAATA	726	ATATACATATACATATACATATA	125	ACGTTTGACGTTTGACGTTTGAC	ND	Low_copy_number_motifs
I	Trichinella sp.T9	GCA_001447505.1	49075249	SRR1971731	TTAGGG	1070.67	11.8333	0	AAAACAAAACAAAACAAAACAAA	765	AACCCTAACCCTAACCCTAACCC	1091	AAAACAAAAAACAAAAAACAAAA	ND	Potential_sample_contamination
I	Trichinella spiralis	GCA_001447595.1	50025957	SRR1534063	ND	ND	3.83333	0	AATATAATATAATATAATATAAT	688	ATATACATATACATATACATATA	155	CCCTAAACCCTAAACCCTAAACC	ND	Low_copy_number_motifs
I	Trichinella zimbabwensis	GCA_001447665.1	50795114	SRR1971671	ND	ND	11	0	ATATAATATAATATAATATAATA	1839	ATATACATATACATATACATATA	202	ACACAACACACAACACACAACAC	ND	Low_copy_number_motifs
II	Enoplus brevis	Not_available	Not_available	ERR660660	TTAGGC	65535	1.16667	65535	AATGCAATGCAATGCAATGCAAT	2418	CCTAAGCCTAAGCCTAAGCCTAA	65535	CACACCACACACCACACACCACA	766	Potential_sample_contamination
III	Elaeophora elaphi	GCA_000499685.1	1480825	ERR536834	ND	ND	0	0	ATGGAATGGAATGGAATGGAATG	ND	ACCAGCACCAGCACCAGCACCAG	ND	AAGCAGTAAGCAGTAAGCAGTAA	1000	Low_copy_number_motifs
III	Gongylonema pulchrum	GCA_900617915.1	322334493	ERR161911	ND	ND	1	0	CCGAGCCGAGCCGAGCCGAGCCG	179	ACACAGACACAGACACAGACACA	114	CATCATCCATCATCCATCATCCA	ND	Low_copy_number_motifs
IV	Meloidogyne arenaria	GCA_003693565.1	163746389	SRR4242468	ND	ND	13	8.83333	TAAATTAAATTAAATTAAATTAA	1005	CCGGAACCGGAACCGGAACCGGA	ND	ACAAACCACAAACCACAAACCAC	132	Low_copy_number_motifs
IV	Meloidogyne chitwoodi	GCA_015183035.1	47477280	ERR1212566	ND	ND	9.16667	0	TAAATTAAATTAAATTAAATTAA	921	AGAGAAAGAGAAAGAGAAAGAGA	1279	AAAAATAAAAAATAAAAAATAAA	186	Low_copy_number_motifs
IV	Meloidogyne incognita	GCA_003693645.1	121964221	SRR4242479	ND	ND	9	0	TAAATTAAATTAAATTAAATTAA	114	CCGGAACCGGAACCGGAACCGGA	ND	AAATCAGAAATCAGAAATCAGAA	304	Low_copy_number_motifs
IV	Meloidogyne javanica	GCA_003693625.1	150345270	SRR4242478	ND	ND	9	0	TAATTTAATTTAATTTAATTTAA	216	CCGGAACCGGAACCGGAACCGGA	ND	CAAACCACAAACCACAAACCACA	105	Low_copy_number_motifs
IV	Meloidogyne luci	GCA_902706615.1	209155305	ERR3700287	ND	ND	2.83333	38	GAATAGAATAGAATAGAATAGAA	ND	CCGAGACCGAGACCGAGACCGAG	ND	AAATCGAAAATCGAAAATCGAAA	ND	Low_copy_number_motifs
IV	Parastrongyloides trichosuri	GCA_000941615.1	42486966	ERR539713	ND	ND	0	0	AAAATAAAATAAAATAAAATAAA	ND	GGTAAAGGTAAAGGTAAAGGTAA	ND	AAATTAAAAATTAAAAATTAAAA	ND	Low_copy_number_motifs
IV	Rhabditophanes sp. KR3021	GCA_000944355.1	47267908	ERR298306	ND	ND	0	1.33333	GGAACGGAACGGAACGGAACGGA	ND	AAGCCTAAGCCTAAGCCTAAGCC	ND	AAAAAACAAAAAACAAAAAACAA	ND	Low_copy_number_motifs
IV	Steinernema feltiae	GCA_007213375.1	121603157	SRR6435394	ND	ND	4.33333	0	GAATGGAATGGAATGGAATGGAA	1177	TATAAATATAAATATAAATATAA	1497	TAGATAATAGATAATAGATAATA	490	Low_copy_number_motifs
IV	Strongyloides papillosus	GCA_005656395.1	58232448	SRR8858650	TTAGGG	340.667	0	6.33	ATCGAATCGAATCGAATCGAATC	556	AACCCTAACCCTAACCCTAACCC	357	AAACCCTAAACCCTAAACCCTAA	ND	Potential_sample_contamination
IV	Strongyloides stercoralis	GCA_000947215.1	42674647	ERR2041465	TTACGG	1855.67	14.17	6.33	AATGGAATGGAATGGAATGGAAT	177	GGTTACGGTTACGGTTACGGTTA	1986	CGTACAACGTACAACGTACAACG	ND	Potential_sample_contamination
IV	Strongyloides venezuelensis	GCA_001028725.1	52178999	ERR696964	ND	ND	0	0	ATGGAATGGAATGGAATGGAATG	ND	AAAAACAAAAACAAAAACAAAAA	ND	AGAGGGAAGAGGGAAGAGGGAAG	ND	Low_copy_number_motifs
V	Ancylostoma duodenale	GCA_000816745.1	332875813	SRR2354285	ND	ND	0	73.5	GAATGGAATGGAATGGAATGGAA	267	ACACATACACATACACATACACA	6131	CACACACCACACACCACACACCA	ND	Low_copy_number_motifs
V	Caenorhabditis sp. 38MB-2015	GCA_900536415.3	100371645	ERR1055246	ND	ND	0	4.5	AAAACAAAACAAAACAAAACAAA	ND	GAACCTGAACCTGAACCTGAACC	ND	ACCCTAGACCCTAGACCCTAGAC	ND	Low_copy_number_motifs
V	Caenorhabditis sp. 40LS-2015	GCA_900536305.3	101228815	ERR1233861	ND	ND	0	0	AAAACAAAACAAAACAAAACAAA	ND	CAAGGACAAGGACAAGGACAAGG	ND	CAAACTACAAACTACAAACTACA	ND	Low_copy_number_motifs
V	Dictyocaulus viviparus	GCA_000816705.1	160963781	SRR1566595	ND	ND	0	0	TAATATAATATAATATAATATAA	ND	CGTTCGCGTTCGCGTTCGCGTTC	ND	CACCAACCACCAACCACCAACCA	ND	Low_copy_number_motifs
V	Diploscapter coronatus	GCA_002207785.1	170492099	DRR029945	ND	ND	1	0	CTAGCCTAGCCTAGCCTAGCCTA	ND	AAAAAGAAAAAGAAAAAGAAAAA	ND	AAGACAGAAGACAGAAGACAGAA	ND	Low_copy_number_motifs
V	Diploscapter pachys	GCA_002287525.1	157719873	SRR8384822	TAGGG	1230	0.666667	0	AGGGTAGGGTAGGGTAGGGTAGG	1375	CCCTATCCCTATCCCTATCCCTA	139	CAATTTTCAATTTTCAATTTTCA	ND	Short_TRM_array
V	Teladorsagia circumcincta	GCA_002352805.1	700607159	SRR3147877	ND	ND	0	32.8333	AATGGAATGGAATGGAATGGAAT	521	GTGTATGTGTATGTGTATGTGTA	255	GACAGACGACAGACGACAGACGA	124	Low_copy_number_motifs

## Sheet: Table S3
Supplemental Table S3. Average counts of 23-mers containing concatemers of each TRM among sub-sampled five million reads of short-read sequencing data.
Clade	Species	TTAGGC	TTAGAC	TTAGGG	TTAGGT	Microsatellite (AAAAAT)
IV	Panagrolaimus davidi	5535	0	4	0	4
IV	Panagrellus redivivus	0	10715	0	0	0
IV	Strongyloides ratti	0	0	185	0	1
V	Caenorhabditis elegans	2215	60	0	1	13
V	Caenorhabditis uteleia	19	0	1	6846	0

## Sheet: Table S4
Supplemental Table S4. Validation of putative TRMs in parasitic nematodes.
	Step 1. Check TRMs in additional sequencing data						Step 2. Check sample source		Step 3. Check putative subtelomeric reads not from the host genome
Species	SRA_accession	BioProject	The most TRM	Average_counts_of_23-mer_with_TTAGGC in five million subsampled reads	Average_counts_of_23-mer_with_TTAGGG in five million subsampled reads	Average_counts_of_23-mer_with_TTACGG in five million subsampled reads	tissue for sequencing	Cultured in	Number of read pairs containing TRM repeats	Number of read pairs where one is unmapped and the other starts with CCCTAA repeats
T. britovi	SRR1963585	PRJNA257433	TTAGGG	0	524.5		entire worms freshly collected from host muscles	mouse	496	0
T. britovi	SRR14041383	PRJNA716532	Not determined	0	0
T. nativa	SRR1958752	PRJNA257433	TTAGGG	3.16667	2966.67		entire worms freshly collected from host muscles	mouse	4146	9
T. nativa	SRR14041382	PRJNA716532	TTAGGG	0	48.8333		entire worms freshly collected from host muscles	rat	99	8
T. nativa	SRR1532981, SRR1532982	PRJNA179527	TTAGGG	0	2281		Not_available	Not_available
T. sp. T9	SRR1971731	PRJNA257433	TTAGGG	0	1070.67		entire worms freshly collected from host muscles	mouse	978	0
S. papillosus	SRR8858650	PRJNA531114	TTAGGG	6.33	340.667
S. papillosus	SRR4242147	PRJNA342390	TTAGGG	19	68
S. papillosus	SRR4241074	PRJNA342789	TTAGGC	8.83333	0
S. ratti	ERR3900850	PRJEB20604	TTAGGG	0	184.5		Not_available	Not_available
S. ratti	SRR4242149	PRJNA342390	TTAGGG	28.1667	461.833		sperm	rat
S. ratti	SRR4242109	PRJNA342789	Not determined	0	0
S. stercoralis	ERR2041465	PRJEB20999	TTACGG	6.33	11.6667	1855.67
S. stercoralis	SRR10915472	PRJNA602131	TTAGGC	121.5	6.33333	0

## Sheet: Table S5
Supplemental Table S5. Summary data of species/isolates of Panagrolaimidae that contain species/isolate names, sampling information for substrate and location, TRMs and TBPs homologous to those of C. elegans. Twenty million sub-sampled reads were used. ND: not determined.
Species/isolate	Substrate/location	Average_counts_of_23-mer_with_TTAGGC_concatemers	Average_counts_of_23-mer_with_TTAGAC_concatemers	Putative_TRM	Average_counts_of_23-mer_with_microsatellite_motif_(AAAAAT)_concatemers	Telomere_maintenance/binding_protein_analysis
Bursaphelenchus xylophilus	Public_data	17912.3	0	TTAGGC	6.16667	analyzed
LJ2060	Rotten apple/Chungju, Republic of Korea	132.5	0	TTAGGC	10	Protein_sequence_not_available
Panagrolaimus davidi	Public_data	21967.7	0	TTAGGC	7.83333	TRT-1_ortholog_not_detected
Panagrolaimus sp. PS1159	Public_data	65535	0	TTAGGC	0	analyzed
LJ2406	Rotten persimmon/Gwanak-gu, Seoul, Republic of Korea	65535	0	TTAGGC	3.5	analyzed
LJ2070	Rotten apple/Chungju, Republic of Korea	100.833	0	TTAGGC	30.16667	Protein_sequence_not_available
LJ2402	Rotten apple/Chungju, Republic of Korea	17584.5	0	TTAGGC	18.33333	Protein_sequence_not_available
LJ2051	Rotten apple/Chungju, Republic of Korea	20.8333	0	TTAGGC	19	Protein_sequence_not_available
LJ2050	Rotten apple/Chungju, Republic of Korea	56.5	0	TTAGGC	21.66667	Protein_sequence_not_available
LJ2400	Rotten fig/Seogwipo, Jeju Island, Republic of Korea	31545.3	0	TTAGGC	0	analyzed
Panagrolaimus sp. PS1579	Public_data	65535	0	TTAGGC	0.5	Protein_sequence_not_available
LJ2281	Rotten mandarin/Jeju, Jeju Island, Republic of Korea	33385.2	0	TTAGGC	7.666667	Protein_sequence_not_available
Panagrolaimus sp. ES5	Public_data	23544	0	TTAGGC	0	Protein_sequence_not_available
LJ2417	Rotten mandarin/Seogwipo, Jeju Island, Republic of Korea	81	0	TTAGGC	19.5	Protein_sequence_not_available
LJ2284	Rotten apple/Chungju, Republic of Korea	0	3705.5	TTAGAC	0	analyzed
LJ2411	Rotten apple/Chungju, Republic of Korea	0	161.833	TTAGAC	45	Protein_sequence_not_available
LJ2072	Rotten apple/Chungju, Republic of Korea	0	38.6667	TTAGAC	41	Protein_sequence_not_available
LJ2401	Rotten pear/Namyangju, Republic of Korea	0	23.3333	TTAGAC	42.16667	Protein_sequence_not_available
LJ2285	Rotten persimmon/Mapo-gu, Seoul, Republic of Korea	0	65535	TTAGAC	6.5	analyzed
Panagrellus redivivus	Public_data	0	41139.8	TTAGAC	0	analyzed

## Sheet: Table S6
Supplemental Table S6. 18S ribosomal DNA sequences in Panagrolaimidae.
Species/isolate	18S rDNA sequence
Bursaphelenchus xylophilus	GCCCGGTTCAAGCCACTGCGATTAAACTAGTTCTCACCAAAGACAATGCCGAAACATCGAACTCCAGCGATCCCTAGTTTTCTCGAAGTAACTCAGTCCCGGGCAGCGACGGGCGGTGTGTACAAAGGGCAGGGACGTAATCAATGCAAGTTAATGACTCACATTTACTTGGAATTCCTCGTTCATGAGAGAAAATTTCAACACTCAATTCCAGCCATAATAATATCTCAACTGTTTGCCAATTCCTGTCGGAAAAGGACAATCACGCTGTTACCACCATTGTAGCACGCGTGCGGCCCCGAACATCTAAGGGCATCACAGACCTGTTATTGCTCAATTTCTTGAGGTTGAAAACCACAAATTCCTTTAAGAAGTGATCACACGCAGCCGAAGCAACAT…
LJ2060	GCCCGGTTCAAGCCAATGCGATCAAATTGATTTTCATCTGTTAAAGCCTTCGTAAAAAGACTTAAACAAACAATCCTCAATCTTCTCGAATTAACCCAGTTCCGGGCAGCGACGGGCGGTGTGTACAAAGGACAGGGACGTAATCAGCGTAAGCTGATGACTTACACTTACTTGAAGTTCCTCGTTCACGAATAATAATTACAATATTCGATCCCAAATACGGAATAATTTGACTCGTTTACCAAATTCTTTCGAATATGGTCACACGCGCTGCAATTTTCATTGTAGCGCGCGTGCAGCCCCAGACATCTTAGGGCATCACAGACCTGTTATTGCTGGGTTTCTTACGACTGGAACGCCGCAAATCCCATTAAGAAGAAAAGAATCACTTATTTCTTT…
Panagrolaimus davidi	GCCCGGTTCAAGCCAATGCGATCAAATTGATTTTCATCTGAAAACTATATACCGAAATATATAGTAACAAACAACCCTCAATCTTCTCGAATTAACCCAGTTCCGGGCAGCGACGGGCGGTGTGTACAAAGGACAGGGACGTAATCAGCGTAAGCTGATGACTTACACTTACTTGAAGTTCCTCGTTCACGAATAATAATTACAATATTCGATCCCAAATACGGAATAATTTGACTCGTTTACCAATTCTTTACAGAAATGGTCACACGCGCTGCAATTTTCATTGTAGCGCGCGTGCAGCCCCAGACATCTTAGGGCATCACAGACCTGTTATTGCTGGGTTTCTTACGACTGGAACGCCGCAAATCCCATTAAGAAGAAAAGAATCACGCTTCAATC…
Panagrolaimus sp. PS1159	GCCCGGTTCAAGCCAATGCGATCAAATTGATTTTCATCTGAAAATCATATTCTGTAAGGAATATGATAACAAACAATCCTCAATCTTCTCGAATTAACCCAGTTCCGGGCAGCGACGGGCGGTGTGTACAAAGGACAGGGACGTAATCAGCGTAAGCTGATGACTTACACTTACTTGAAGTTCCTCGTTCACGAATAATAATTACAATATTCGATCCCAAATACGGAATAATTTGACTCGTTTACCAATTCTTTACAGAAATGGTCACACGCGCTGCAATTTTCATTGTAGCGCGCGTGCAGCCCCAGACATCTTAGGGCATCACAGACCTGTTATTGCTGGGTTTCTTACGACTGGAACGCCGCAAATCCCATTAAGAAGAAAAGAATCACGCTTTCT…
LJ2406	GCCCGGTTCAAGCCAATGCGATCAAATTGATTTTCATCTGTATTCTTATCCGTAAGAATAAAAATACAAACAATCCTCAATCTTCTCGAATTAACCCAGTTCCGGGCAGCGACGGGCGGTGTGTACAAAGGACAGGGACGTAATCAGCGTAAGCTGATGACTTACACTTACTTGAAGTTCCTCGTTCACGAATAATAATTACAATATTCGATCCCAAATACGGAATAATTTGACTCGTTTACCAATTCTTTTCAGAAATGGTCACACGCGCTGCAATTTTCATTGTAGCGCGCGTGCAGCCCCAGACATCTTAGGGCATCACAGACCTGTTATTGCTGGGTTTCTTACGACTGGCGGCCGCAAATCCCATTAAGAAGAAAAGTTTTTAATGAAATCCCC…
LJ2070	GCCCGGTTCAAGCCAATGCGATCAAATTGATTTTCATCTGTTAAAGCCTTCGTAAAAAGACTTAAACAAACAATCCTCAATCTTCTCGAATTAACCCAGTTCCGGGCAGCGACGGGCGGTGTGTACAAAGGACAGGGACGTAATCAGCGTAAGCTGATGACTTACACTTACTTGAAGTTCCTCGTTCACGAATAATAATTACAATATTCGATCCCAAATACGGAATAATTTGACTCGTTTACCAAATTCTTTCGAATATGGTCACACGCGCTGCAATTTTCATTGTAGCGCGCGTGCAGCCCCAGACATCTTAGGGCATCACAGACCTGTTATTGCTGGGTTTCTTACGACTGGAACGCCGCAAATCCCATTAAGAAGAAAAGAATCACTTATTTCTTT…
LJ2402	GCCCGGTTCAAGCCAATGCGATCAAATTGATTTTCATCTGTTAAAGCCTTCGTAAAAAGACTTAAACAAACAATCCTCAATCTTCTCGAATTAACCCAGTTCCGGGCAGCGACGGGCGGTGTGTACAAAGGACAGGGACGTAATCAGCGTAAGCTGATGACTTACACTTACTTGAAGTTCCTCGTTCACGAATAATAATTACAATATTCGATCCCAAATACGGAATAATTTGACTCGTTTACCAAATTCTTTCGAATATGGTCACACGCGCTGCAATTTTCATTGTAGCGCGCGTGCAGCCCCAGACATCTTAGGGCATCACAGACCTGTTATTGCTGGGTTTCTTACGACTGGAACGCCGCAAATCCCATTAAGAAGAAAAGAATCACTTATTTCTTT…
LJ2051	GCCCGGTTCAAGCCAATGCGATCAAATTGATTTTCATCTGTTAAAGCCTTCGTAAAAAGACTTAAACAAACAATCCTCAATCTTCTCGAATTAACCCAGTTCCGGGCAGCGACGGGCGGTGTGTACAAAGGACAGGGACGTAATCAGCGTAAGCTGATGACTTACACTTACTTGAAGTTCCTCGTTCACGAATAATAATTACAATATTCGATCCCAAATACGGAATAATTTGACTCGTTTACCAAATTCTTTCGAATATGGTCACACGCGCTGCAATTTTCATTGTAGCGCGCGTGCAGCCCCAGACATCTTAGGGCATCACAGACCTGTTATTGCTGGGTTTCTTACGACTGGAACGCCGCAAATCCCATTAAGAAGAAAAGAATCACTTATTTCTTT…
LJ2050	GCCCGGTTCAAGCCAATGCGATCAAATTGATTTTCATCTGTTGAAGCCTTCGTAAAAAGACTTAAACAAACAATCCTCAATCTTCTCGAATTAACCCAGTTCCGGGCAGCGACGGGCGGTGTGTACAAAGGACAGGGACGTAATCAGCGTAAGCTGATGACTTACACTTACTTGAAGTTCCTCGTTCACGAATAATAATTACAATATTCGATCCCAAATACGGAATAATTTGACTCGTTTACCAAATTCTTTCGAATATGGTCACACGCGCTGCAATTTTCATTGTAGCGCGCGTGCAGCCCCAGACATCTTAGGGCATCACAGACCTGTTATTGCTGGGTTTCTTACGACTGGAACGCCGCAAATCCCATTAAGAAGAAAAGAATCACTTATTTCTTT…
LJ2400	GCCCGGTTCAAGCCAATGCGATCAAATTGATTTTCATCTGTTAAAGCCTTCGTAAAAAGACTTAAACAAACAATCCTCAATCTTCTCGAATTAACCCAGTTCCGGGCAGCGACGGGCGGTGTGTACAAAGGACAGGGACGTAATCAGCGTAAGCTGATGACTTACACTTACTTGAAGTTCCTCGTTCACGAATAATAATTACAATATTCGATCCCAAATACGGAATAATTTGACTCGTTTACCAAATTCTTTCGAATATGGTCACACGCGCTGCAATTTTCATTGTAGCGCGCGTGCAGCCCCAGACATCTTAGGGCATCACAGACCTGTTATTGCTGGGTTTCTTACGACTGGAACGCCGCAAATCCCATTAAGAAGAAAAGAATCACTTATTTCTTT…
Panagrolaimus sp. PS1579	GCCCGGTTCAAGCCAATGCGATCAAATTGATTTTCATCTGTTAAAGCCTTCGTAAAAAGACTTAAACAAACAATCCTCAATCTTCTCGAATTAACCCAGTTCCGGGCAGCGACGGGCGGTGTGTACAAAGGACAGGGACGTAATCAGCGTAAGCTGATGACTTACACTTACTTGAAGTTCCTCGTTCACGAATAATAATTACAATATTCGATCCCAAATACGGAATAATTTGACTCGTTTACCAAATTCTTTCGAATATGGTCACACGCGCTGCAATTTTCATTGTAGCGCGCGTGCAGCCCCAGACATCTTAGGGCATCACAGACCTGTTATTGCTGGGTTTCTTACGACTGGAACGCCGCAAATCCCATTAAGAAGAAAAGAATCACTTATTTCTTT…
LJ2281	GCCCGGTTCAAGCCAATGCGATCAAATTGATTTTCATCTGTTAAAGCCTTCGTAAAAAGACTTAAACAAACAATCCTCAATCTTCTCGAATTAACCCAGTTCCGGGCAGCGACGGGCGGTGTGTACAAAGGACAGGGACGTAATCAGCGTAAGCTGATGACTTACACTTACTTGAAGTTCCTCGTTCACGAATAATAATTACAATATTCGATCCCAAATACGAGATAATTTGACTCGTTTACCAAATTCTTTCGAATATGGTCACACGCGCTGCAATTTTCATTGTAGCGCGCGTGCAGCCCCAGACATCTTAGGGCATCACAGACCTGTTATTGCTGGGTTTCTTACGACTGGAACGCCGCAAATCCCATTAAGAAGAAAAGAATCACTTATTTCTTT…
Panagrolaimus sp. ES5	GCCCGGTTCAAACCAATGCGATCAAATTGATTTTCATCTGTTAAAGCCTTCGTAAAAAGACTTAAACAAACAATCCTCAATCTTCTCGAATTAATCCAGTTCCGGGCAGCGACGGGCGGTGTGTACAAAGGACAGGGACGTAATCAGCGTAAGCTGATGACTTACACTTACTTGAAGTTCCTCGTTCACGAATAATAATTACAATATTCGATCCCAAATACGGAATAATTTGACTCGTTTACCAAATTCTTTCGAATATGGTCACACGCGCTGCAATTTTCATTGTAGCGCGCGTGCAGCCCCAGACATCTTAGGGCATCACAGACCTGTTATTGCTGGGTTTCTTACGACTGGAACGCCGCAAATCCCATTAAGAAGAAAAGAATCACTTATTTCTTT…
LJ2417	GCCCGGTTCAAGCCAATGCGATCAAATTGATTTTCATCTGTTAAAGCCTTCGTAAAAAGACTTAAACAAACAATCCTCAATCTTCTCGAATTAACCCAGTTCCGGGCAGCGACGGGCGGTGTGTACAAAGGACAGGGACGTAATCAGCGTAAGCTGATGACTTACACTTACTTGAAGTTCCTCGTTCACGAATAATAATTACAATATTCGATCCCAAATACGGAATAATTTGACTCGTTTACCAAATTCTTTCGAATATGGTCACACGCGCTGCAATTTTCATTGTAGCGCGCGTGCAGCCCCAGACATCTTAGGGCATCACAGACCTGTTATTGCTGGGTTTCTTACGACTGGAACGCCGCAAATCCCATTAAGAAGAAAAGAATCACTTATTTCTTT…
LJ2284	GCCCGGTTCAAGCCAACGCGATCAAACCGCTTTTCGCCACAAAGGGGCCCCGAAGGACACGCCTAAGCAACAATCCACGGTCTTCTCGAATCAACTCAGTCCCGGGCAGCGACGGGCGGTGTGTACAAAGGACAGGGACGTAATCAGCGTGAGCTGATGACTCACACTTACTTGAAGTTCCTTGTTCACAGAGAATAATTGCAATCTCTGATCCCAAATACGGGATAATTTGACTCGTTTACCATACGATCTCTCGCATGGGCACAGCGCGCTGCAATTTTCATTGTAGCGCGCGTGCGGCCCCAGACATCTTAGGGCATCACAGACCTGTTATTGCTGGGTCTCATACAACTAGAATAAAGCTGCAAATCCCATTAAGAAGGTTCAGTTCCAGCAATA…
LJ2411	GCCCGGTTCAAGCCAACGCGATCAAACCGCTTTTCGCCACAAAGAGGCCCCGAAGGACCAACTAAGCGACAATCCACGGTCTTCTCGAATCAACTCAGTCCCGGGCAGCGACGGGCGGTGTGTACAAAGGACAGGGACGTAATCAGCGTGAGCTAATGACTCACACTTACTTGAAGTTCCTTGTTCACAGAGAATAGTTGCAATCTCTGATCCCAAGTACGGAATAATTTGACTCGTTTACCATACGATTTCTCGCATGGGCACACGCGCGCTGCAATTTACATTGTAGCGCGCGTGCAGCCCCAGACATCTTAGGGCATCACAGACCTGTTATCGCTGGTTTTCATACAACTAGGATGAAGCTGCAAATCCCATTAAGAAGGTTCAGTATCAGCAATA…
LJ2072	GCCCGGTTCAAGCCAACGCGATCAAACCGCTTTTCGCCACAAAGAGGCCCCGAAGGACCAACTAAGCGACAATCCACGGTCTTCTCGAATCAACTCAGTCCCGGGCAGCGACGGGCGGTGTGTACAAAGGACAGGGACGTAATCAGCGTGAGCTAATGACTCACACTTACTTGAAGTTCCTTGTTCACAGAGAATAGTTGCAATCTCTGATCCCAAGTACGGAATAATTTGACTCGTTTACCATACGATTTCTCGCATGGGCACAGCGCGCTGCAATTTTCATTGTAGCGCGCGTGCGGCCCCAGACATCTTAGGGCATCACAGACCTGTTATTGCTGGGTCTCATACAACTATGATGAAGCTGCAAATCCCATTAAGAAGGTTCAGTTCCAGCGATAA…
LJ2401	GCCCGGTTCAAGCCAACGCGATCAAACCGCTTTTCGCCACAAAGAGGCCCCGAAGGACCAACTAAGCGACAATCCACGGTCTTCTCGAATCAACTCAGTCCCGGGCAGCGACGGGCGGTGTGTACAAAGGACAGGGACGTAATCAGCGTGAGCTAATGACTCACACTTACTTGAAGTTCCTTGTTCACAGAGAATAGTTGCAATCTCTGATCCCAAGTACGGAATAATTTGACTCGTTTACCATACGATTTCTCGCATGGGCACAGCGCGCTGCAATTTACATTGTAGCGCGCGTGCAGCCCCAGACATCTTAGGGCATCACAGACCTGTTATCGCTGGTTTTCATACAACTATGATGAAGCTGCAAATCCCATTAAGAAGGTTCAGTTCCAGCGATAA…
LJ2285	GCCCGGTTCAAGCCAACGCGATCAAACCGCTTTTCGCCACAAAGAGGCCCCGAAGGACCAACTAAGCGACAATCCACGGTCTTCTCGAATCAACTCAGTCCCGGGCAGCGACGGGCGGTGTGTACAAAGGACAGGGACGTAATCAGCGTGAGCTGATGACTCACACTTACTTGAAGTTCCTTGTTCACAGAGAATAATTGCAATCTCTGATCCCAAATACGGGATAATTTGACTCGTTTACCATACGATCTCTCGCATGGGCACAGCGCGCTGCAATTTTCATTGTAGCGCGCGTGCGGCCCCAGACATCTTAGGGCATCACAGACCTGTTATTGCTGGGTCTCATACAACTATGATGAAGCTGCAAATCCCATTAAGAAGGTTCAGTTCCAGCGATAA…
Panagrellus redivivus	GCCCGGTTCAAGCCAACGCGATCAAACCGCTTTTCGCCACAAAGGGGCCCCGAAGGACACGCCTAAGCAACAATCCACGGTCTTCTCGAATCAACTCAGTCCCCGGGCAGCGACGGGCGGTGTGTACAAAGGACAGGGACGTAATCAGCGTGAGCTGATGACTCACACTTACTTGAAGTTCCTTGTTCACAGAGAATAATTGCAATCTCTGATCCCAAATACGGGATAATTTGACTCGTTTACCATACGATCTCTCGCATGGGCACAGCGCGCTGCAATTTTCATTGTAGCGCGCGTGCGGCCCCAGACATCTTAGGGCATCACAGACCTGTTATTGCTGGGTCTCATACAACTAGAATAAAGCTGCAAATCCCATTAAGAAGGTTCAGTTCCAGCAAT…

## Sheet: Table S7
Supplemental Table S7. Summary of Hi-C scaffolding of HiFi-based genome assemblies of LJ2284 and LJ2406.
Isolate	type	object	object_beg	object_end	part_number	component_type	component_id/gap_length	component_beg/gap_type	component_end/linkage	orientation/Linkage_evidence	end_with_TRM_cluster
LJ2284	scaffolded	scaffold_1	1	12089317	1	W	ptg000003l	1	12089317	+	yes
LJ2284	scaffolded	scaffold_1	12089318	12089517	2	N	200	scaffold	yes	proximity_ligation	no
LJ2284	scaffolded	scaffold_1	12089518	13593394	3	W	ptg000020l	1	1503877	+	no
LJ2284	scaffolded	scaffold_1	13593395	13593594	4	N	200	scaffold	yes	proximity_ligation	no
LJ2284	scaffolded	scaffold_1	13593595	15208887	5	W	ptg000046l	1	1615293	-	no
LJ2284	scaffolded	scaffold_2	1	12295080	1	W	ptg000005l	1	12295080	+	no
LJ2284	scaffolded	scaffold_2	12295081	12295280	2	N	200	scaffold	yes	proximity_ligation	no
LJ2284	scaffolded	scaffold_2	12295281	12747745	3	W	ptg000015l	1	452465	-	no
LJ2284	scaffolded	scaffold_2	12747746	12747945	4	N	200	scaffold	yes	proximity_ligation	no
LJ2284	scaffolded	scaffold_2	12747946	13419113	5	W	ptg000016l	1	671168	-	no
LJ2284	scaffolded	scaffold_2	13419114	13419313	6	N	200	scaffold	yes	proximity_ligation	no
LJ2284	scaffolded	scaffold_2	13419314	13887594	7	W	ptg000017l	1	468281	+	yes
LJ2284	scaffolded	scaffold_3	1	12034745	1	W	ptg000002l	1	12034745	+	yes
LJ2284	scaffolded	scaffold_3	12034746	12034945	2	N	200	scaffold	yes	proximity_ligation	no
LJ2284	scaffolded	scaffold_3	12034946	13833147	3	W	ptg000006l	1	1798202	+	yes
LJ2284	scaffolded	scaffold_4	1	813621	1	W	ptg000008l	1	813621	-	yes
LJ2284	scaffolded	scaffold_4	813622	813821	2	N	200	scaffold	yes	proximity_ligation	no
LJ2284	scaffolded	scaffold_4	813822	7304720	3	W	ptg000009l	1	6490899	+	no
LJ2284	scaffolded	scaffold_4	7304721	7304920	4	N	200	scaffold	yes	proximity_ligation	no
LJ2284	scaffolded	scaffold_4	7304921	12826737	5	W	ptg000001l	1	5521817	+	no
LJ2284	scaffolded	scaffold_5	1	359810	1	W	ptg000023l	1	359810	+	no
LJ2284	scaffolded	scaffold_5	359811	360010	2	N	200	scaffold	yes	proximity_ligation	no
LJ2284	scaffolded	scaffold_5	360011	12204166	3	W	ptg000004l	1	11844156	+	yes
LJ2284	not scaffolded, but containing TRM clusters	scaffold_7	1	2980046	1	W	ptg000013l	1	2980046	-	yes
LJ2284	not scaffolded, but containing TRM clusters	scaffold_9	1	285105	1	W	ptg000007l	1	285105	+	yes
LJ2284	not scaffolded, but containing TRM clusters	scaffold_10	1	269580	1	W	ptg000029l	1	269580	+	yes
LJ2284	not scaffolded, but containing TRM clusters	scaffold_20	1	53660	1	W	ptg000039l	1	53660	+	yes
LJ2406	scaffolded	scaffold_1	1	7246339	1	W	ptg000022l	1	7246339	+	no
LJ2406	scaffolded	scaffold_1	7246340	7246539	2	N	200	scaffold	yes	proximity_ligation	no
LJ2406	scaffolded	scaffold_1	7246540	27928831	3	W	ptg000003l	1	20682292	-	yes
LJ2406	scaffolded	scaffold_4	1	2028940	1	W	ptg000035l	1	2028940	+	no
LJ2406	scaffolded	scaffold_4	2028941	2029140	2	N	200	scaffold	yes	proximity_ligation	no
LJ2406	scaffolded	scaffold_4	2029141	3093977	3	W	ptg000050l	1	1064837	-	no
LJ2406	scaffolded	scaffold_4	3093978	3094177	4	N	200	scaffold	yes	proximity_ligation	no
LJ2406	scaffolded	scaffold_4	3094178	12764603	5	W	ptg000006l	1	9670426	+	no
LJ2406	scaffolded	scaffold_8	1	3342108	1	W	ptg000014l	1	3342108	+	no
LJ2406	scaffolded	scaffold_8	3342109	3342308	2	N	200	scaffold	yes	proximity_ligation	no
LJ2406	scaffolded	scaffold_8	3342309	4498968	3	W	ptg000027l	1	1156660	-	no
LJ2406	scaffolded	scaffold_8	4498969	4499168	4	N	200	scaffold	yes	proximity_ligation	no
LJ2406	scaffolded	scaffold_8	4499169	7643304	5	W	ptg000042l	1	3144136	-	no
LJ2406	scaffolded	scaffold_10	1	1444334	1	W	ptg000038l	1	1444334	+	no
LJ2406	scaffolded	scaffold_10	1444335	1444534	2	N	200	scaffold	yes	proximity_ligation	no
LJ2406	scaffolded	scaffold_10	1444535	4038209	3	W	ptg000025l	1	2593675	-	no
LJ2406	not scaffolded, but containing TRM clusters	scaffold_2	1	21960451	1	W	ptg000018l	1	21960451	+	yes
LJ2406	not scaffolded, but containing TRM clusters	scaffold_5	1	12513626	1	W	ptg000026l	1	12513626	+	yes
LJ2406	not scaffolded, but containing TRM clusters	scaffold_6	1	8305115	1	W	ptg000016l	1	8305115	+	yes
LJ2406	not scaffolded, but containing TRM clusters	scaffold_9	1	5428293	1	W	ptg000004l	1	5428293	+	yes
LJ2406	not scaffolded, but containing TRM clusters	scaffold_12	1	3518084	1	W	ptg000008l	1	3518084	+	yes
LJ2406	not scaffolded, but containing TRM clusters	scaffold_25	1	1345912	1	W	ptg000021l	1	1345912	+	yes
LJ2406	not scaffolded, but containing TRM clusters	scaffold_29	1	1089467	1	W	ptg000104l	1	1089467	+	yes
LJ2406	not scaffolded, but containing TRM clusters	scaffold_31	1	945286	1	W	ptg000023l	1	945286	+	yes
LJ2406	not scaffolded, but containing TRM clusters	scaffold_39	1	675834	1	W	ptg000052l	1	675834	+	yes
LJ2406	not scaffolded, but containing TRM clusters	scaffold_92	1	129533	1	W	ptg000247l	1	129533	+	yes
LJ2406	not scaffolded, but containing TRM clusters	scaffold_107	1	103949	1	W	ptg000168l	1	103949	+	yes
LJ2406	not scaffolded, but containing TRM clusters	scaffold_1032	1	24749	1	W	ptg001783l	1	24749	+	yes

## Sheet: Table S8
Supplemental Table S8. HiFi- and/or HiC-based de novo genome assembly statistics for four Panagrolaimidae isolates.
Isolate	LJ2284	LJ2284_scaffolded	LJ2285	lj2400	LJ2406	LJ2406_scaffolded
Sum (bp)	79118495, n = 81	74369955, n = 68	66968616, n = 74	186381947, n = 215	231160840, n = 1172	230455429, n = 1139
Average (bp)	976772	1.09368e+06	904981	866893	197236	202331
Maximum length (bp)	12295080	15208887	11796734	18695491	21960451	27928831
N50 length (bp)	11844156, n = 4	13833147, n = 3	8740543, n = 4	7127204, n = 8	3518084, n = 11	7643304, n = 8
N60 length (bp)	11844156, n = 4	12826737, n = 4	8740543, n = 4	4217536, n = 11	2642151, n = 18	3207845, n = 14
N70 length (bp)	5521817, n = 6	12826737, n = 4	4004748, n = 6	3203317, n = 15	1156660, n = 31	1345912, n = 25
N80 length (bp)	4664000, n = 7	12204166, n = 5	3640334, n = 7	1994965, n = 23	241153, n = 72	256263, n = 64
N90 length (bp)	1615293, n = 10	12204166, n = 5	1045476, n = 11	671379, n = 40	41752, n = 418	42241, n = 397
N100 length (bp)	14517, n = 81	13901, n = 68	13142, n = 74	13094, n = 215	12849, n = 1172	12849, n = 1139
N_count	0	1800	0	0	0	1200
Gaps	0	9	0	0	0	6
Number of ends with TTAGRC clusters	10	10	8	8	14	14
Number of telomere-to-telomere contigs/scaffolds	0	1	0	0	1	1

## Sheet: Table S9
Supplemental Table S9. Raw data of TRM proportions for clustered telomeric repeats at the end of each contig/scaffold.
Isolate	Contig	Telomere_region	Scaffold	Telomere_region	Telomere_length	TTAGAC_count	TTAGGC_count	TTAGAC_percentage	TTAGGC_percentage	Others_percentage
LJ2284	ptg000002l	2665-01-01	scaffold_3_L	2665-01-01	2665	398	0	89.606	0	10.394
LJ2284	ptg000003l	1-1749	scaffold_1	1-1749	1749	275	0	94.3396	0	5.66038
LJ2284	ptg000004l	11842269-11844156	scaffold_5	12202279-12204166	1888	308	0	97.8814	0	2.11864
LJ2284	ptg000006l	1796275-1798202	scaffold_3_R	13831220-13833147	1928	316	0	98.3402	0	1.65975
LJ2284	ptg000007l	282617-285105	scaffold_9	282617-285105	2489	388	0	93.5315	0	6.46846
LJ2284	ptg000008l	812647-813621	scaffold_4	1-975	975	156	0	96	0	4
LJ2284	ptg000013l	2977843-2980046	scaffold_7	2204-01-01	2204	361	0	98.2759	0	1.72414
LJ2284	ptg000017l	467526-468281	scaffold_2	13886839-13887594	756	126	0	100	0	0
LJ2284	ptg000029l	268206-269580	scaffold_10	268206-269580	1375	228	0	99.4909	0	0.509091
LJ2284	ptg000039l	53111-53660	scaffold_20	53111-53660	550	91	0	99.2727	0	0.727273
LJ2285	ptg000002l	10699106-10706094	NA	NA	6989	1164	0	99.9285	0	0.071541
LJ2285	ptg000007l	7319-01-01	NA	NA	7319	1216	0	99.6857	0	0.314251
LJ2285	ptg000009l	1141732-1146582	NA	NA	4851	786	0	97.2171	0	2.78293
LJ2285	ptg000011l	9463-01-01	NA	NA	9463	1574	0	99.7992	0	0.200782
LJ2285	ptg000020l	9408-01-01	NA	NA	9408	1567	0	99.9362	0	0.0637755
LJ2285	ptg000025l	7233-01-01	NA	NA	7233	1202	0	99.7097	0	0.290336
LJ2285	ptg000038l	7385-01-01	NA	NA	7385	1225	0	99.5261	0	0.473934
LJ2285	ptg000128l	15629-19470	NA	NA	3842	634	0	99.0109	0	0.989068
LJ2400	ptg000012l	18688649-18695491	NA	NA	6843	0	1136	0	99.6054	0.394564
LJ2400	ptg000028l	8342-01-01	NA	NA	8342	0	1375	0	98.8971	1.10285
LJ2400	ptg000074l	33682-43314	NA	NA	9633	0	1600	0	99.6574	0.342572
LJ2400	ptg000113l	80296-87580	NA	NA	7285	0	1211	0	99.7392	0.26081
LJ2400	ptg000145l	4776-01-01	NA	NA	4776	0	742	0	93.2161	6.78392
LJ2400	ptg000183l	22291-30301	NA	NA	8011	0	1314	0	98.4147	1.58532
LJ2400	ptg000189l	1-771	NA	NA	771	0	123	0	95.7198	4.28016
LJ2400	ptg000193l	7497-01-01	NA	NA	7497	0	1245	0	99.6399	0.360144
LJ2406	ptg000003l	1-18973	scaffold_1	27909860-27928832	18973	0	3162	0	99.9947	0.00527065
LJ2406	ptg000004l	1-21836	scaffold_9	1-21836	21836	0	3638	0	99.9634	0.0366367
LJ2406	ptg000008l	3502802-3518084	scaffold_12	3502802-3518084	15283	0	2546	0	99.9542	0.0458025
LJ2406	ptg000016l	1-11635	scaffold_6	1-11635	11635	0	1938	0	99.9398	0.0601633
LJ2406	ptg000018l_L	1-341	scaffold_2_L	1-341	341	0	56	0	98.5337	1.46628
LJ2406	ptg000018l_R	21942068-21960451	scaffold_2_R	21942068-21960451	18384	0	3064	0	100	0
LJ2406	ptg000021l	1334170-1345912	scaffold_25	1334170-1345912	11743	0	1956	0	99.9404	0.05961
LJ2406	ptg000023l	1-22769	scaffold_31	1-22769	22769	0	3782	0	99.6618	0.338179
LJ2406	ptg000026l	12495292-12513626	scaffold_5	12495292-12513626	18335	0	3031	0	99.1873	0.812653
LJ2406	ptg000052l	1-13800	scaffold_39	1-13800	13800	0	2300	0	100	0
LJ2406	ptg000104l	1073677-1089467	scaffold_29	1073677-1089467	15791	0	2631	0	99.9683	0.0316636
LJ2406	ptg000168l	1-12685	scaffold_107	1-12685	12685	0	2114	0	99.9921	0.00788333
LJ2406	ptg000247l	1-46912	scaffold_92	1-46912	46912	0	7779	0	99.4927	0.507333
LJ2406	ptg001783l	9932-24749	scaffold_1032	9932-24749	14818	0	2458	0	99.5276	0.472398

## Sheet: Table S10
Supplemental Table S10. Distributions of telomere, ITS and subtelomeric TTAGRC-containing units in telomere-containing contigs/scaffolds.
Isolate	Contig	Start	End	Scaffold	Start	End	Region	Direction	Type	TTAGAC_count	TTAGGC_count	GTCTAA_count	GCCTAA_count	Structure
LJ2284	ptg000002l	1	2665	scaffold_3	1	2665	Telomeric	GYCTAA	TEL	0	0	365	0	4
LJ2284	ptg000002l	2662	4077	scaffold_3	2662	4077	Subtelomeric	TTAGRC	168mer_LJ2284	7	0	0	0	4
LJ2284	ptg000002l	5307	13261	scaffold_3	5307	13261	Subtelomeric	GYCTAA	168mer_LJ2284	0	0	37	0	4
LJ2284	ptg000003l	1	1749	scaffold_1	1	1749	Telomeric	GYCTAA	TEL	0	0	248	0	4
LJ2284	ptg000003l	1750	1953	scaffold_1	1750	1953	Subtelomeric	GYCTAA	17mer_LJ2284	0	0	12	0	4
LJ2284	ptg000004l	11841215	11842268	scaffold_5	12201225	12202278	Subtelomeric	TTAGRC	17mer_LJ2284	57	0	0	0	4
LJ2284	ptg000004l	11842269	11844156	scaffold_5	12202279	12204166	Telomeric	TTAGRC	TEL	306	0	0	0	4
LJ2284	ptg000006l	1795663	1796274	scaffold_3	13830608	13831219	Subtelomeric	TTAGRC	17mer_LJ2284	31	0	0	0	4
LJ2284	ptg000006l	1796275	1798202	scaffold_3	13831220	13833147	Telomeric	TTAGRC	TEL	308	0	0	0	4
LJ2284	ptg000007l	223792	235044	scaffold_9	223792	235044	Subtelomeric	GYCTAA	168mer-1_LJ2284	0	0	0	52	2
LJ2284	ptg000007l	235884	247136	scaffold_9	235884	247136	Subtelomeric	GYCTAA	168mer-1_LJ2284	0	0	0	52	2
LJ2284	ptg000007l	257887	267130	scaffold_9	257887	267130	Subtelomeric	GYCTAA	168mer-1_LJ2284	0	1	0	43	2
LJ2284	ptg000007l	268139	269819	scaffold_9	268139	269819	Subtelomeric	GYCTAA	168mer-1_LJ2284	0	0	0	9	2
LJ2284	ptg000007l	274491	275086	scaffold_9	274491	275086	Subtelomeric	TTAGRC	17mer_LJ2284	33	0	0	0	2
LJ2284	ptg000007l	278774	278929	scaffold_9	278774	278929	Subtelomeric	TTAGRC	ITS	26	0	0	0	2
LJ2284	ptg000007l	282617	285105	scaffold_9	282617	285105	Telomeric	TTAGRC	TEL	367	0	0	0	2
LJ2284	ptg000008l	736632	717614	scaffold_4	115026	96008	Subtelomeric	GYCTAA	2717mer_LJ2284	0	0	7	0	4
LJ2284	ptg000008l	811882	812646	scaffold_4	1740	976	Subtelomeric	TTAGRC	17mer_LJ2284	40	0	0	0	4
LJ2284	ptg000008l	812647	813621	scaffold_4	975	1	Telomeric	TTAGRC	TEL	142	0	0	0	4
LJ2284	ptg000013l	2953363	2955300	scaffold_7	26684	24747	Subtelomeric	TTAGRC	17mer-1_LJ2284	104	0	0	0	3
LJ2284	ptg000013l	2977843	2980046	scaffold_7	2204	1	Telomeric	TTAGRC	TEL	331	0	0	0	3
LJ2284	ptg000017l	459675	460813	scaffold_2	13878988	13880126	Subtelomeric	TTAGRC	17mer_LJ2284	62	0	0	0	2
LJ2284	ptg000017l	464609	464656	scaffold_2	13883922	13883969	Subtelomeric	TTAGRC	ITS	8	0	0	0	2
LJ2284	ptg000017l	467526	468281	scaffold_2	13886839	13887594	Telomeric	TTAGRC	TEL	126	0	0	0	2
LJ2284	ptg000029l	266523	268205	scaffold_10	266523	268205	Subtelomeric	TTAGRC	17mer_LJ2284	89	0	0	0	4
LJ2284	ptg000029l	268206	269580	scaffold_10	268206	269580	Telomeric	TTAGRC	TEL	225	0	0	0	4
LJ2284	ptg000039l	49899	53110	scaffold_20	49899	53110	Subtelomeric	TTAGRC	17mer_LJ2284	173	0	0	0	4
LJ2284	ptg000039l	53111	53660	scaffold_20	53111	53660	Telomeric	TTAGRC	TEL	89	0	0	0	4
LJ2285	ptg000002l	10642887	10643199	NA	NA	NA	Subtelomeric	TTAGRC	cluster7_LJ2285	5	0	1	0	2
LJ2285	ptg000002l	10643200	10643301	NA	NA	NA	Subtelomeric	TTAGRC	ITS	17	0	0	0	2
LJ2285	ptg000002l	10699106	10706094	NA	NA	NA	Telomeric	TTAGRC	TEL	1157	0	0	0	2
LJ2285	ptg000007l	1	7319	NA	NA	NA	Telomeric	GYCTAA	TEL	0	0	1144	0	4
LJ2285	ptg000007l	7320	7507	NA	NA	NA	Subtelomeric	GYCTAA	cluster1_LJ2285	1	0	6	0	4
LJ2285	ptg000009l	1127656	1127860	NA	NA	NA	Subtelomeric	TTAGRC	cluster5_LJ2285	5	0	1	0	3
LJ2285	ptg000009l	1141732	1146582	NA	NA	NA	Telomeric	TTAGRC	TEL	750	0	0	0	3
LJ2285	ptg000011l	1	9463	NA	NA	NA	Telomeric	GYCTAA	TEL	0	0	1430	0	4
LJ2285	ptg000011l	9464	9609	NA	NA	NA	Subtelomeric	GYCTAA	cluster2_LJ2285	1	0	6	0	4
LJ2285	ptg000020l	1	9408	NA	NA	NA	Telomeric	GYCTAA	TEL	0	0	1531	0	3
LJ2285	ptg000020l	19913	20148	NA	NA	NA	Subtelomeric	GYCTAA	cluster6_LJ2285	1	0	8	0	3
LJ2285	ptg000025l	1	7233	NA	NA	NA	Telomeric	GYCTAA	TEL	0	0	1089	0	4
LJ2285	ptg000025l	7234	7495	NA	NA	NA	Subtelomeric	GYCTAA	cluster3_LJ2285	1	0	9	0	4
LJ2285	ptg000038l	1	7385	NA	NA	NA	Telomeric	GYCTAA	TEL	0	0	1110	0	4
LJ2285	ptg000038l	7386	7616	NA	NA	NA	Subtelomeric	GYCTAA	cluster4_LJ2285	1	0	5	0	4
LJ2285	ptg000128l	15629	19470	NA	NA	NA	Telomeric	TTAGRC	TEL	600	0	0	0	1
LJ2400	ptg000012l	18688369	18688648	NA	NA	NA	Subtelomeric	TTAGRC	14mer-2_LJ2400	0	18	0	0	4
LJ2400	ptg000012l	18688649	18695491	NA	NA	NA	Telomeric	TTAGRC	TEL	0	1060	0	0	4
LJ2400	ptg000028l	1	8342	NA	NA	NA	Telomeric	GYCTAA	TEL	0	0	0	1250	4
LJ2400	ptg000028l	8343	44499	NA	NA	NA	Subtelomeric	GYCTAA	1364mer_LJ2400	27	33	0	144	4
LJ2400	ptg000074l	1213	16320	NA	NA	NA	Subtelomeric	TTAGRC	1259mer_LJ2400	0	42	19	12	5
LJ2400	ptg000074l	16463	16540	NA	NA	NA	Subtelomeric	TTAGRC	ITS	0	13	0	0	5
LJ2400	ptg000074l	33348	33681	NA	NA	NA	Subtelomeric	TTAGRC	20mer_LJ2400	0	33	0	0	5
LJ2400	ptg000074l	33682	43314	NA	NA	NA	Telomeric	TTAGRC	TEL	0	1448	0	0	5
LJ2400	ptg000113l	80296	87580	NA	NA	NA	Telomeric	TTAGRC	TEL	0	1197	0	0	1
LJ2400	ptg000145l	1	4776	NA	NA	NA	Telomeric	GYCTAA	TEL	0	0	0	683	5
LJ2400	ptg000145l	4777	5000	NA	NA	NA	Subtelomeric	GYCTAA	14mer-1_LJ2400	0	0	0	15	5
LJ2400	ptg000145l	14443	14490	NA	NA	NA	Subtelomeric	GYCTAA	ITS	0	0	0	8	5
LJ2400	ptg000183l	1	22290	NA	NA	NA	Subtelomeric	TTAGRC	1279mer_LJ2400	0	83	15	35	4
LJ2400	ptg000183l	22291	30301	NA	NA	NA	Telomeric	TTAGRC	TEL	0	1262	0	0	4
LJ2400	ptg000189l	1	771	NA	NA	NA	Telomeric	GYCTAA	TEL	0	0	0	112	1
LJ2400	ptg000193l	1	7497	NA	NA	NA	Telomeric	GYCTAA	TEL	0	0	0	1123	4
LJ2400	ptg000193l	7498	35356	NA	NA	NA	Subtelomeric	GYCTAA	1309mer_LJ2400	19	21	0	98	4
LJ2406	ptg000003l	1	18973	scaffold_1	27928832	27909860	Telomeric	GYCTAA	TEL	0	0	0	2846	4
LJ2406	ptg000003l	18974	19113	scaffold_1	27909859	27909720	Subtelomeric	GYCTAA	14mer-3_LJ2406	0	0	0	10	4
LJ2406	ptg000004l	1	21836	scaffold_9	1	21836	Telomeric	GYCTAA	TEL	0	0	0	3275	4
LJ2406	ptg000004l	21837	22368	scaffold_9	21837	22368	Subtelomeric	GYCTAA	14mer-3_LJ2406	0	0	0	36	4
LJ2406	ptg000008l	3502802	3518084	scaffold_12	3502802	3518084	Telomeric	TTAGRC	TEL	0	2546	0	0	1
LJ2406	ptg000016l	1	11635	scaffold_6	1	11635	Telomeric	GYCTAA	TEL	0	0	0	1750	3
LJ2406	ptg000016l	50605	50772	scaffold_6	50605	50772	Subtelomeric	GYCTAA	14mer-4_LJ2406	0	0	12	0	3
LJ2406	ptg000018l	1	341	scaffold_2	1	341	Telomeric	GYCTAA	TEL	0	0	0	51	3
LJ2406	ptg000018l	18223	18755	scaffold_2	18223	18755	Subtelomeric	GYCTAA	14mer-3_LJ2406	0	0	0	35	3
LJ2406	ptg000018l	21940034	21940509	scaffold_2	21940034	21940509	Subtelomeric	TTAGRC	14mer-3_LJ2406	0	32	0	0	2
LJ2406	ptg000018l	21940510	21940563	scaffold_2	21940510	21940563	Subtelomeric	TTAGRC	ITS	0	9	0	0	2
LJ2406	ptg000018l	21942068	21960451	scaffold_2	21942068	21960451	Telomeric	TTAGRC	TEL	0	3064	0	0	2
LJ2406	ptg000021l	1333876	1334169	scaffold_25	1333876	1334169	Subtelomeric	TTAGRC	14mer-3_LJ2406	0	17	0	0	4
LJ2406	ptg000021l	1334170	1345912	scaffold_25	1334170	1345912	Telomeric	TTAGRC	TEL	0	1884	0	0	4
LJ2406	ptg000023l	1	22769	scaffold_31	1	22769	Telomeric	GYCTAA	TEL	0	0	0	3408	4
LJ2406	ptg000023l	22770	23035	scaffold_31	22770	23035	Subtelomeric	GYCTAA	14mer-3_LJ2406	0	0	0	16	4
LJ2406	ptg000026l	12358835	12359182	scaffold_5	12358835	12359182	Subtelomeric	TTAGRC	14mer-3_LJ2406	3	21	0	0	2
LJ2406	ptg000026l	12359320	12359475	scaffold_5	12359320	12359475	Subtelomeric	TTAGRC	ITS	0	26	0	0	2
LJ2406	ptg000026l	12495292	12513626	scaffold_5	12495292	12513626	Telomeric	TTAGRC	TEL	0	2749	0	0	2
LJ2406	ptg000052l	1	13800	scaffold_39	1	13800	Telomeric	GYCTAA	TEL	0	0	0	2300	4
LJ2406	ptg000052l	13801	14248	scaffold_39	13801	14248	Subtelomeric	GYCTAA	14mer-3_LJ2406	0	0	0	30	4
LJ2406	ptg000104l	1073201	1073676	scaffold_29	1073201	1073676	Subtelomeric	TTAGRC	14mer-4_LJ2406	31	0	0	0	4
LJ2406	ptg000104l	1073677	1089467	scaffold_29	1073677	1089467	Telomeric	TTAGRC	TEL	0	2631	0	0	4
LJ2406	ptg000168l	1	12685	scaffold_107	1	12685	Telomeric	GYCTAA	TEL	0	0	0	1903	1
LJ2406	ptg000247l	1	46912	scaffold_92	1	46912	Telomeric	GYCTAA	TEL	0	0	0	7138	5
LJ2406	ptg000247l	46913	47216	scaffold_92	46913	47216	Subtelomeric	GYCTAA	14mer-4_LJ2406	0	0	17	4	5
LJ2406	ptg000247l	121159	122880	scaffold_92	121159	122880	Subtelomeric	GYCTAA	ITS	0	0	0	287	5
LJ2406	ptg000247l	124385	124438	scaffold_92	124385	124438	Subtelomeric	GYCTAA	ITS	0	0	0	9	5
LJ2406	ptg000247l	124439	124914	scaffold_92	124439	124914	Subtelomeric	GYCTAA	14mer-3_LJ2406	0	0	0	32	5
LJ2406	ptg001783l	9792	9931	scaffold_1032	9792	9931	Subtelomeric	TTAGRC	14mer-3_LJ2406	0	9	0	0	4
LJ2406	ptg001783l	9932	24749	scaffold_1032	9932	24749	Telomeric	TTAGRC	TEL	0	2337	0	0	4

[truncated: 4 more sheets: Table S11, Table S12, Table S13, Table S14]
